# Supplementary material for: Charge transfer doping of graphene oxide with nickel oxide nanoparticles for stable and efficient carbon-based, all-inorganic CsPbBr3 perovskite solar cells
Source: Royal Society of Chemistry journal article supplement (doi:10.1039/d3dt00662j), 2023-01-01
Supplement: d3dt00662j1.pdf [file d3dt00662j1.pdf]

Supporting Information for

Charge transfer doping of graphene oxide with nickel oxide nanoparticles for stable and efficient carbon-based, all-inorganic CsPbBr<sub>3</sub> perovskite solar cells

Jie Dou,<sup>a</sup> Jin Tan,<sup>a,\*</sup> Benlin He,<sup>b</sup> Jialong Duan<sup>a</sup> and Qunwei Tang<sup>a</sup>

<sup>a</sup> Institute of Carbon Neutrality, College of Chemical and Biological Engineering, Shandong University of Science and Technology, Qingdao 266590, PR China.

<sup>b</sup> College of Materials Science and Engineering, Ocean University of China, Qingdao 266100, PR China.

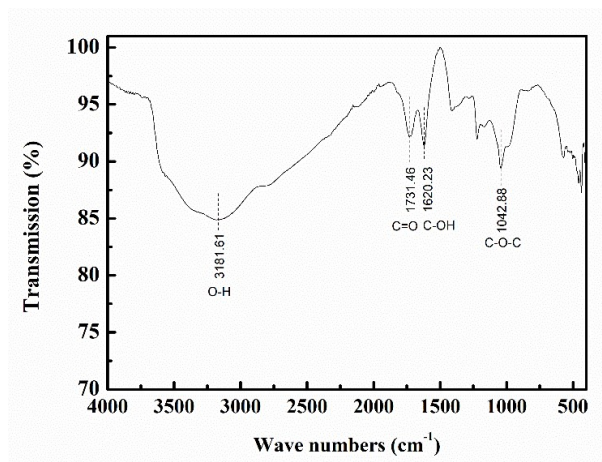

Figure S1. The FTIR spectrum of GO.

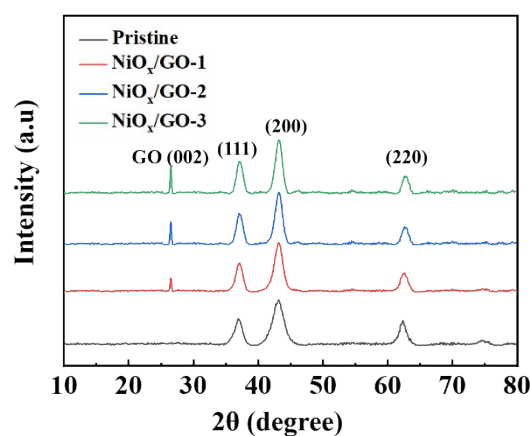

Figure S2. The XRD patterns of NiO<sub>x</sub> nanoparticles, NiO<sub>x</sub>/GO-1, NiO<sub>x</sub>/GO-2 and NiO<sub>x</sub>/GO-3.

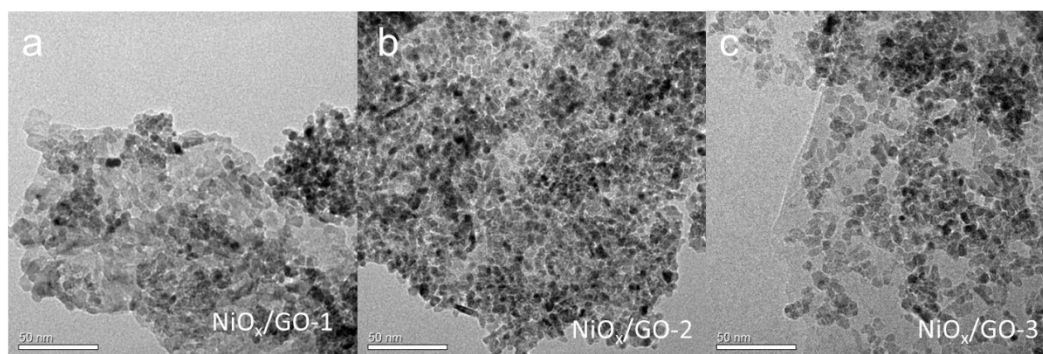

**Figure S3.** The TEM images of NiO<sub>x</sub> nanoparticle decorated GO.

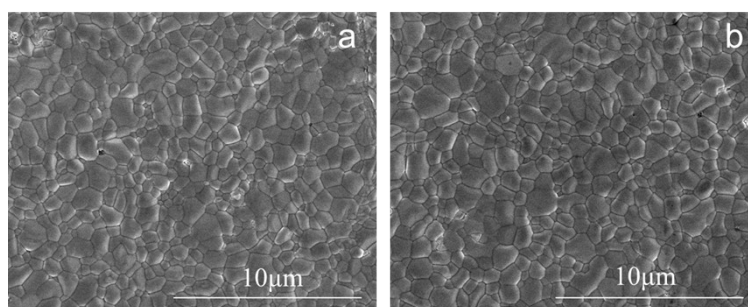

**Figure S4.** The SEM images of CsPbBr<sub>3</sub> (a) without and (b) with NiO<sub>x</sub>/GO-2.

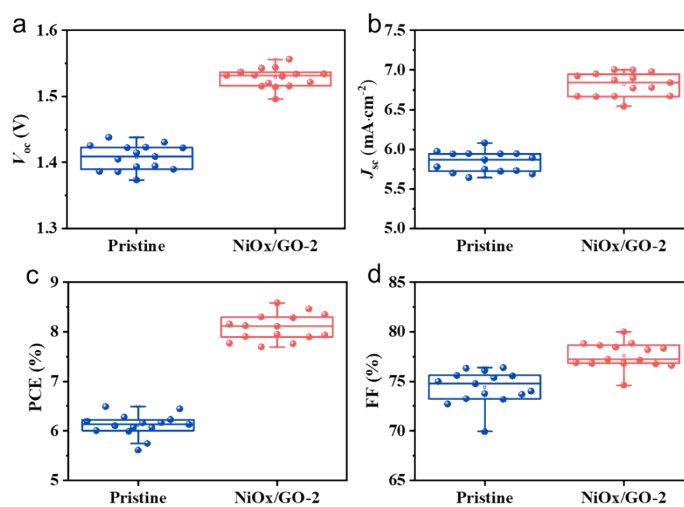

**Figure S5.** Box charts of photovoltaic parameters of (a)  $J_{sc}$ , (b)  $V_{oc}$ , (c) FF and, (d) PCE extracted from J-V measurements for the PSCs without and with NiO<sub>x</sub>/GO-2.

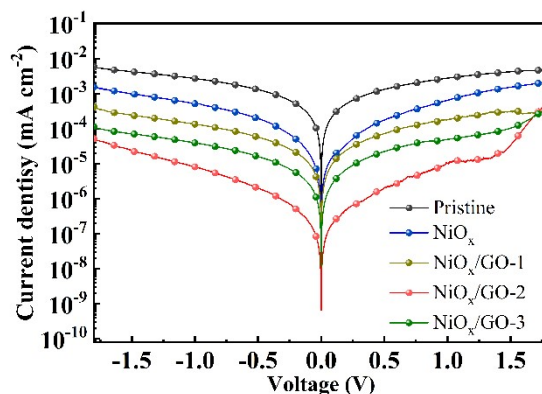

**Figure S6** The J-V curves of various CsPbBr<sub>3</sub> PSCs in the dark.

**Table S1.** The dosages for preparing NiO<sub>x</sub> decorated GO.

| Sample                 | GO       | Ni(NO <sub>3</sub> ) <sub>2</sub> ·6H <sub>2</sub> O | H <sub>2</sub> NCONH <sub>2</sub> |
|------------------------|----------|------------------------------------------------------|-----------------------------------|
| NiO <sub>x</sub> /GO-1 | 0.0642 g | 0.75 g                                               | 1.5 g                             |
| NiO <sub>x</sub> /GO-2 | 0.1926 g | 0.75 g                                               | 1.5 g                             |
| NiO <sub>x</sub> /GO-3 | 0.7704 g | 0.75 g                                               | 1.5 g                             |

**Table S2.** The photovoltaic data for the all-inorganic CsPbBr<sub>3</sub> PSCs with different additives.

| Samples                                                                            | V <sub>oc</sub> (V) | J <sub>sc</sub> (mA·cm <sup>-2</sup> ) | PCE (%) | FF (%) | Ref       |
|------------------------------------------------------------------------------------|---------------------|----------------------------------------|---------|--------|-----------|
| FTO/TiO <sub>2</sub> /CsPbBr <sub>3</sub> +Br-GO/Carbon                            | 1.579               | 7.72                                   | 9.44    | 77.44  | 1         |
| ITO/GO/CsPbBr <sub>3</sub> /PEDOT:PSS/Au                                           | 1.57                | 8.50                                   | 10.34   | 77.40  | 2         |
| ITO/SnO <sub>2</sub> /CsPbBr <sub>3</sub> /NiO/Au                                  | 1.57                | 7.57                                   | 7.15    | 77.44  | 3         |
| ITO/TiO <sub>2</sub> /CsPbBr <sub>3</sub> /NiO/Au                                  | 1.11                | 8.65                                   | 4.04    | 41.98  | 4         |
| FTO/TiO <sub>2</sub> /CsPbBr <sub>3</sub> /Carton                                  | 1.46                | 8.12                                   | 9.6     | 81     | 5         |
| FTO/TiO <sub>2</sub> /CsPbBr <sub>3</sub> /DAP/Carton                              | 1.621               | 7.57                                   | 10.31   | 84.05  | 6         |
| FTO/TiO <sub>2</sub> /CsPbBr <sub>3</sub> /Carton                                  | 1.43                | 6.81                                   | 7.81    | 79.96  | 7         |
| FTO/TiO <sub>2</sub> /CsPbBr <sub>3</sub> /Carton                                  | 1.30                | 5.64                                   | 5.30    | 72.3   | 8         |
| FTO/TiO <sub>2</sub> /CsPbBr <sub>3</sub> -thiourea/Carton                         | 1.38                | 8.81                                   | 9.11    | 75     | 9         |
| FTO/TiO <sub>2</sub> /CsPbBr <sub>3</sub> /UV-360/Carton                           | 1.568               | 7.69                                   | 9.61    | 79.70  | 10        |
| FTO/TiO <sub>2</sub> /CsPbBr <sub>3</sub> /Pt <sub>3</sub> M Carton                | 1.520               | 6.77                                   | 7.62    | 74.05  | 11        |
| FTO/TiO <sub>2</sub> /CsPbBr <sub>3</sub> -g-C <sub>3</sub> N <sub>4</sub> /Carton | 1.277               | 7.80                                   | 8.00    | 80.32  | 12        |
| FTO/TiO <sub>2</sub> /T-CsPbBr <sub>3</sub> /Carton                                | 1.595               | 7.56                                   | 9.82    | 81.41  | 13        |
| FTO/TiO <sub>2</sub> /M-CsPbBr <sub>3</sub> /Carton                                | 1.584               | 7.42                                   | 9.65    | 82.11  | 14        |
| FTO/TiO <sub>2</sub> /CsPbBr <sub>3</sub> -L-lysine/Carton                         | 1.565               | 7.64                                   | 9.68    | 81.0   | 15        |
| FTO/TiO <sub>2</sub> /CsPbBr <sub>3</sub> /[BMMIm]Cl/Carton                        | 1.61                | 7.45                                   | 9.92    | 83     | 16        |
| FTO/TiO <sub>2</sub> /CsPbBr <sub>3</sub> /Carton                                  | 1.545               | 7.37                                   | 9.35    | 82.2   | 17        |
| FTO/TiO <sub>2</sub> /CsPbBr <sub>3</sub> -PEG/Carton                              | 1.41                | 7.56                                   | 7.8     | 73     | 18        |
| FTO/TiO <sub>2</sub> /CsPbBr <sub>3</sub> -BiBr <sub>3</sub> /Carton               | 1.39                | 7.83                                   | 8.73    | 80     | 19        |
| FTO/TiO <sub>2</sub> /CsPbBr <sub>3</sub> /Carton                                  | 1.15                | 7.65                                   | 5.84    | 66.3   | 20        |
| FTO/TiO <sub>2</sub> /CsPbBr <sub>3</sub> /Carton-PANi/G                           | 1.59                | 6.87                                   | 8.87    | 81.21  | 21        |
| FTO/TiO <sub>2</sub> /CsPbBr <sub>3</sub> /ONC/CNT                                 | 1.33                | 5.55                                   | 5.87    | 80     | 22        |
| FTO/TiO <sub>2</sub> /CsPbBr <sub>3</sub> -SnBr <sub>2</sub> /Carton               | 1.37                | 7.66                                   | 8.63    | 82.22  | 23        |
| FTO/TiO <sub>2</sub> /CsPbBr <sub>3</sub> /PVAc/Carton                             | 1.540               | 7.28                                   | 8.62    | 76.91  | 24        |
| FTO/TiO <sub>2</sub> /CsPbBr <sub>3</sub> /Carton                                  | 1.34                | 6.46                                   | 5.86    | 68.04  | 25        |
| FTO/TiO <sub>2</sub> /CsPbBr <sub>3</sub> -ZrO/Carton                              | 1.44                | 7.75                                   | 8.19    | 73.52  | 26        |
| FTO/TiO <sub>2</sub> /CsPbBr <sub>3</sub> -RPQDs/Carton                            | 1.470               | 7.33                                   | 8.20    | 76     | 27        |
| FTO/TiO <sub>2</sub> /CsPbBr <sub>3</sub> /CdZnSe@ZnSe/Carton                      | 1.498               | 7.25                                   | 8.65    | 79.6   | 28        |
| FTO/TiO <sub>2</sub> /CsPbBr <sub>3</sub> /Carton                                  | 1.20                | 5.3                                    | 3.9     | 64     | 29        |
| FTO/TiO <sub>2</sub> /CsPbBr <sub>3</sub> /NiO <sub>x</sub> /GO Carton             | 1.537               | 6.98                                   | 8.59    | 80.1   | This work |

**Table S3.** Photovoltaic data of the champion PSCs fabricated without and with NiO<sub>x</sub>/GO.

| Samples                | $J_{sc}$ (mA · cm <sup>-2</sup> ) | $V_{oc}$ (V) | FF (%) | PCE (%) |
|------------------------|-----------------------------------|--------------|--------|---------|
| Pristine               | 6.08                              | 1.423        | 75.0   | 6.49    |
| Pure NiO <sub>x</sub>  | 6.28                              | 1.442        | 69.6   | 6.30    |
| NiO <sub>x</sub> /GO-1 | 6.31                              | 1.473        | 78.3   | 7.28    |
| NiO <sub>x</sub> /GO-2 | 6.98                              | 1.537        | 80.1   | 8.59    |
| NiO <sub>x</sub> /GO-3 | 6.46                              | 1.487        | 80.0   | 7.68    |

**Table S4.** Photovoltaic data for the pristine and NiO<sub>x</sub>/GO-2 PSCs.

| Samples                | $J_{sc}$ (mA · cm <sup>-2</sup> ) | $V_{oc}$ (V) | FF (%)   | PCE (%)   |
|------------------------|-----------------------------------|--------------|----------|-----------|
| Pristine               | 5.84±0.13                         | 1.407±0.019  | 74.4±1.7 | 6.11±0.22 |
| NiO <sub>x</sub> /GO-2 | 6.81±0.15                         | 1.528±0.015  | 77.6±1.3 | 8.08±0.26 |

**Table S5.** The summary of carrier lifetime from TRPL analysis.

| Samples                | $\tau_1$ (ns) | A <sub>1</sub> | $\tau_2$ (ns) | A <sub>2</sub> | $\tau_{ave}$ (ns) |
|------------------------|---------------|----------------|---------------|----------------|-------------------|
| Pristine               | 0.069         | 73.67%         | 2.714         | 26.33%         | 0.156             |
| Pure NiO <sub>x</sub>  | 0.086         | 66.47%         | 3.799         | 33.53%         | 0.177             |
| NiO <sub>x</sub> /GO-1 | 0.090         | 68.8%          | 4.311         | 31.17%         | 0.186             |
| NiO <sub>x</sub> /GO-2 | 0.122         | 44.47%         | 4.730         | 55.53%         | 0.198             |
| NiO <sub>x</sub> /GO-3 | 0.073         | 74.75%         | 3.030         | 25.25%         | 0.161             |

**Table S6.** The summary of impedance from EIS analysis.

| Samples                | R <sub>s</sub> (ohm · cm <sup>2</sup> ) | R <sub>rec</sub> (ohm · cm <sup>2</sup> ) | CPE (nF · cm <sup>2</sup> ) |
|------------------------|-----------------------------------------|-------------------------------------------|-----------------------------|
| Pristine               | 3.77                                    | 13.6                                      | 86.3                        |
| NiO <sub>x</sub> /GO-2 | 2.55                                    | 22.5                                      | 67.1                        |

## References

1. Sun, X., He, B., Zhu, J., Zhu, R., Chen, H., Duan, Y., Tang, Q., Multifunctional Brominated Graphene Oxide Boosted Charge Extraction for High-Efficiency and Stable All-Inorganic CsPbBr<sub>3</sub> Perovskite Solar Cells. *Chem. Eng. J* 2021, *412*, 128727.
2. Mehrabian, M., Afshar, E. N., Yousefzadeh, S. A., Simulating the Thickness Effect of the Graphene Oxide Layer in CsPbBr<sub>3</sub>- Based Solar Cells. *Mater. Res. Express* 2021, *8*, 35509.
3. Zou, Y., Cao, F., Chen, P., He, R., Tong, A., Yin, C., Lan, Z., Sun, W., Wu, J., Stable and Highly Efficient All-Inorganic CsPbBr<sub>3</sub> Perovskite Solar

- Cells by Interface Engineering with NiO NCS Modification. *Electrochim. Acta* 2022, **435**, 141392.
4. Mehrabian, M., Dalir, S., Mahmoudi, G., Mirosław, B., Babashkina, M. G., Dektereva, A. V., Safin, D. A., A Highly Stable All-Inorganic CsPbBr<sub>3</sub> Perovskite Solar Cell. *Eur. J Inorg. Chem.* 2019, **32**, 3699.
  5. J. Yan, S. Hou, X. Li, J. Dong, L. Zou, M. Yang, J. Xing, H. Liu, H. Hao, *Solar Energ. Mater. Sol. C.*, 2022, **234**, 111420.
  6. J. Ti, J. Zhu, B. He, Z. Zong, X. Yao, R. Tui, H. Huang, C. Chen, H. Chen, Y. Duan, Q. Tang, *J. Mater. Chem. A*, 2022, **10**, 6649-6661.
  7. L. Liu, S.-E. Yang, P. Liu, Y. Chen, *Solar Energy*, 2022, **232**, 320-327.
  8. X. Cao, G. Zhang, L. Hao, X. Ding, T. Dong, X. Li, Q. Zeng, X. He, Y. Jia, J. Wei, *J. Alloy. Compd.*, 2022, **919**, 165722.
  9. J. Bi, J. Chang, M. Lei, W. Zhang, F. Meng, G. Wang, *ACS Appl. Mater. Interfaces*, 2022, **14**, 48888-48896.
  10. J. Zhu, M. Tang, B. He, K. Shen, W. Zhang, X. Sun, M. Sun, H. Chen, Y. Duan, Q. Tang, *Chem. Eng. J.*, 2021, **404**, 126548.
  11. Y. Zhao, J. Zhu, B. He, Q. Tang, *Chem. Commun.*, 2021, **57**, 7577-7580.
  12. W.W. Liu, Y.C. Liu, C.Y. Cui, S.T. Niu, W.J. Niu, M.C. Liu, M.J. Liu, B. Gu, L.Y. Zhang, K. Zhao, F. Ran, Y.L. Chueh, *Materials Today Energy*, 2021, **21**, 100782.
  13. Z. Gong, B. He, J. Zhu, X. Yao, S. Wang, H. Chen, Y. Duan, Q. Tang, *Solar RRL*, 2021, **5**, 2000819.
  14. J. Zhu, B. He, Z. Gong, Y. Ding, W. Zhang, X. Li, Z. Zong, H. Chen, Q. Tang, *ChemSusChem*, 2020, **13**, 1834-1843.
  15. W. Zhang, X. Liu, B. He, J. Zhu, X. Li, K. Shen, H. Chen, Y. Duan, Q. Tang, *ACS Appl. Mater. Interfaces*, 2020, **12**, 36092-36101.
  16. W. Zhang, X. Liu, B. He, Z. Gong, J. Zhu, Y. Ding, H. Chen, Q. Tang, *ACS Appl. Mater. Interfaces*, 2020, **12**, 4540-4548.
  17. T. Xiang, Y. Zhang, H. Wu, J. Li, L. Yang, K. Wang, J. Xia, Z. Deng, J. Xiao, W. Li, Z. Ku, F. Huang, J. Zhong, Y. Peng, Y.-B. Cheng, *Solar Energ. Mater. Sol. C.*, 2020, **206**, 110317.
  18. Y. Ren, N. Zhang, Z. Arain, M. Mateen, J. Chen, Y. Sun, Z. Li, *J. Power Sources*, 2020, **475**, 228676.
  19. Y. Pei, H. Guo, Z. Hu, J. Zhang, Y. Zhu, *J. Alloy. Compd.*, 2020, **835**, 155283.
  20. X. Cao, G. Zhang, L. Jiang, Y. Cai, Y. Gao, W. Yang, X. He, Q. Zeng, G. Xing, Y. Jia, J. Wei, *Water, ACS Appl. Mater. Interfaces*, 2020, **12**, 5925-5931.
  21. F. Bu, B. He, Y. Ding, X. Li, X. Sun, J. Duan, Y. Zhao, H. Chen, Q. Tang, *Solar Energ. Mater. Sol. C.*, 2020, **205**, 110267.
  22. R.B.K. Siram, M.V. Khenkin, A. Niazov-Elkan, M.A. K, H. Weissman, E.A. Katz, I. Visoly-Fisher, B. Rybtchinski, *Nanoscale*, 2019, **11**, 3733-3740.
  23. H. Guo, Y. Pei, J. Zhang, C. Cai, K. Zhou, Y. Zhu, *J. Mater. Chem. C*, 2019, **7**, 11234-11243.
  24. Y. Ding, B. He, J. Zhu, W. Zhang, G. Su, J. Duan, Y. Zhao, H. Chen, Q. Tang, *ACS Sustain. Chem. Eng.*, 2019, **7**, 19286-19294.
  25. P. Teng, X. Han, J. Li, Y. Xu, L. Kang, Y. Wang, Y. Yang, T. Yu, *ACS Appl. Mater. Interfaces*, 2018, **10**, 9541-9546.
  26. I. Poli, J. Baker, J. McGettrick, F. De Rossi, S. Eslava, T. Watson, P.J. Cameron, *J. Mater. Chem. A*, 2018, **6**, 18677-18686.
  27. G. Liao, J. Duan, Y. Zhao, Q. Tang, *Solar Energy*, 2018, **171**, 279-285.
  28. Q. Li, J. Bai, T. Zhang, C. Nie, J. Duan, Q. Tang, *Chem. Commun.*, 2018, **54**, 9575-9578.
  29. X. Chang, W. Li, L. Zhu, H. Liu, H. Geng, S. Xiang, J. Liu, H. Chen, *ACS Appl. Mater. Interfaces*, 2016, **8**, 33649-33655.
